# Supplementary material for: Essential medicines for breast cancer in low and middle income countries
Source: PubMed Central journal article supplement (PMC4538762; doi:10.1186/s12885-015-1583-4), 2015-08-18

## Annexes:

### Annex 1 - Overview of LMICs included in the study (World Bank income level, WHO region, year of NEML publication)

| Country                  | World bank income level | WHO region            | Year of (latest update) Essential Medicines list |
|--------------------------|-------------------------|-----------------------|--------------------------------------------------|
| Afghanistan              | low income              | Eastern Mediterranean | 2007                                             |
| Algeria                  | upper middle income     | Africa                | 2006                                             |
| Angola                   | upper middle income     | Africa                | 2008                                             |
| Armenia                  | lower middle income     | Europe                | 2010                                             |
| Bangladesh               | low income              | South-East Asia       | 2008                                             |
| Belize                   | lower middle income     | America               | 2009                                             |
| Bhutan                   | lower middle income     | South-East Asia       | 2009                                             |
| Bolivia                  | lower middle income     | America               | 2011                                             |
| Brazil                   | upper middle income     | America               | 2010                                             |
| Burkina Faso             | low income              | Africa                | 2007                                             |
| Burundi                  | low income              | Africa                | 2009                                             |
| Cameroon                 | lower middle income     | Africa                | 2011                                             |
| Central African Republic | low income              | Africa                | 2009                                             |
| Chad                     | low income              | Africa                | 2007                                             |
| China                    | upper middle income     | Western Pacific       | -----*                                           |
| Congo                    | lower middle income     | Africa                | 2008                                             |
| Congo, D.R.              | low income              | Africa                | 2010                                             |
| Cooks Island             | NA                      | Western Pacific       | 2007                                             |
| Djibouti                 | lower middle income     | Eastern Mediterranean | 2007                                             |
| Dominic Republic         | upper middle income     | America               | 2005                                             |
| Ecuador                  | upper middle income     | America               | 2009                                             |
| Egypt                    | lower middle income     | Eastern Mediterranean | 2006                                             |
| El Salvador              | lower middle income     | America               | 2011                                             |
| Eritrea                  | low income              | Africa                | 2010                                             |
| Ethiopia                 | low income              | Africa                | 2010                                             |
| Fiji                     | lower middle income     | Western Pacific       | 2006                                             |
| Ghana                    | lower middle income     | Africa                | 2010                                             |
| Guyana                   | lower middle income     | America               | 2009                                             |
| Honduras                 | lower middle income     | America               | 2009                                             |
| India                    | lower middle income     | South-East Asia       | 2011                                             |
| Indonesia                | lower middle income     | South-East Asia       | 2008                                             |
| Iraq                     | lower middle income     | Eastern Mediterranean | 2010                                             |
| Jamaica                  | upper middle income     | America               | 2008                                             |
| Jordan                   | upper middle income     | Eastern Mediterranean | 2009                                             |
| Kenya                    | low income              | Africa                | 2010                                             |

|                                |                     |                       |      |
|--------------------------------|---------------------|-----------------------|------|
| Kiribati                       | lower middle income | Western Pacific       | 2009 |
| Kyrgyzstan                     | low income          | Europe                | 2009 |
| Lesotho                        | lower middle income | Africa                | 2005 |
| Madagascar                     | low income          | Africa                | 2008 |
| Malaysia                       | upper middle income | Western Pacific       | 2008 |
| Maldives                       | upper middle income | South-East Asia       | 2009 |
| Mali                           | low income          | Africa                | 2008 |
| Mauritania                     | low income          | Africa                | 2007 |
| Moldova                        | lower middle income | Europe                | 2009 |
| Morocco                        | lower middle income | Eastern Mediterranean | 2008 |
| Namibia                        | upper middle income | Africa                | 2008 |
| Nauru                          | NA                  | Western Pacific       | 2010 |
| Nepal                          | low income          | South-East Asia       | 2009 |
| Nicaragua                      | lower middle income | America               | 2011 |
| Nigeria                        | lower middle income | Africa                | 2010 |
| Niue                           | NA                  | Western Pacific       | 2006 |
| Pakistan                       | lower middle income | Eastern Mediterranean | 2007 |
| Paraguay                       | lower middle income | America               | 2009 |
| Peru                           | upper middle income | America               | 2010 |
| Philippines                    | lower middle income | Western Pacific       | 2008 |
| Rwanda                         | low income          | Africa                | 2010 |
| Senegal                        | lower middle income | Africa                | 2008 |
| Seychelles                     | upper middle income | Africa                | 2010 |
| Solomon Islands                | lower middle income | Western Pacific       | 2010 |
| Somalia                        | NA                  | Eastern Mediterranean | 2006 |
| South Africa                   | upper middle income | Africa                | 2006 |
| Sri Lanka                      | lower middle income | South-East Asia       | 2009 |
| St. Vincent and the Grenadines | upper middle income | America               | 2010 |
| Sudan                          | lower middle income | Eastern Mediterranean | 2007 |
| Tajikistan                     | low income          | Europe                | 2009 |
| Tanzania                       | low income          | Africa                | 2007 |
| Thailand                       | upper middle income | South-East Asia       | 2008 |
| Tonga                          | lower middle income | Western Pacific       | 2007 |
| Tuvalu                         | upper middle income | Western Pacific       | 2008 |
| Uganda                         | low income          | Africa                | 2007 |
| Ukraine                        | lower middle income | Europe                | 2009 |
| Uruguay                        | upper middle income | America               | 2011 |
| Vanuatu                        | lower middle income | Western Pacific       | 2007 |
| Yemen                          | lower middle income | Eastern Mediterranean | 2007 |
| Zimbabwe                       | low income          | Africa                | 2006 |

\* In China, provincial EMLs were combined to make an EML list, instead of the NEML

**Annex2 - International consensus guidelines for breast cancer treatment:**

| The guideline                                                                                   | Type of cancer         | Type of tumor                                                         | Main therapy             | First line treatment                                                            | Second line treatment                              | Notes                                                    |
|-------------------------------------------------------------------------------------------------|------------------------|-----------------------------------------------------------------------|--------------------------|---------------------------------------------------------------------------------|----------------------------------------------------|----------------------------------------------------------|
| <b>1st international consensus for advanced breast cancer (2012)</b>                            | advanced breast cancer | ER+/HER2-                                                             | ET                       | tamoxifen (LMICs) or AIs (in the rest)*                                         | tamoxifen or AIs or fulvestrant, megestrol acetate | *: for Postmenopausal women                              |
|                                                                                                 |                        | HER2+                                                                 | Anti-HER2 agents         | trastuzumab or lapatinib                                                        | trastuzumab & lapatinib                            | *:CT as explained in HER2-                               |
|                                                                                                 |                        |                                                                       |                          | trastuzumab & CT                                                                | (trastuzumab & CT*) or (lapatinib & capecitabine)  |                                                          |
|                                                                                                 |                        | ER+/HER2+                                                             | Anti-HER2 agents+ ET     | (trastuzumab , lapatinib) & (tamoxifen or AI)                                   | (trastuzumab & lapatinib) & (tamoxifen or AI)      |                                                          |
| HER2-                                                                                           | CT                     | Anthracycline or taxane based regimens or capecitabine or vinorelbine |                          | Sequential chemotherapy instead of combination chemotherapy                     |                                                    |                                                          |
| <b>St Gallen international expert consensus on Primary therapy of Early breast cancer(2011)</b> | early breast cancer    | Luminal A                                                             | ET                       | tamoxifen or AIs*                                                               |                                                    | *: AIs if tamoxifen is contraindicated or Postmenopausal |
|                                                                                                 |                        | Luminal (HER2-) B                                                     | ET+/-CT                  | tamoxifen or AIs*(ET)<br>Both Anthracyclines &Taxanes (CT)                      |                                                    | *: AIs if tamoxifen is contraindicated or Postmenopausal |
|                                                                                                 |                        | Luminal (HER2+) B                                                     | CT+ ET+ Anti-HER2 agents | tamoxifen or AIs* (ET)<br>Both Anthracyclines & Taxanes(CT)<br>Anti-HER2 agents |                                                    | *: AIs if tamoxifen is contraindicated or Postmenopausal |
|                                                                                                 |                        | Non luminal (HER2+)                                                   | CT+ Anti-HER2 agents     | CT+ Anti-HER2 agents                                                            |                                                    |                                                          |
|                                                                                                 |                        | Triple negative                                                       | CT                       | Anthracyclines &Taxanes and an alkylating agent (typically cyclophosphamide)    |                                                    |                                                          |
|                                                                                                 |                        | Special histological types                                            | ET                       | tamoxifen or AIs*                                                               |                                                    | *: AIs if tamoxifen is contraindicated or Postmenopausal |
| CT                                                                                              | CT                     |                                                                       |                          |                                                                                 |                                                    |                                                          |

ER: estrogen receptor; HER2: human epidermal growth factor receptor type 2 oncogene; HER2+: HER2 overexpressed tumor;HER2-: not HER2+;  
CT: chemotherapy; ET: endocrine therapy;

Annex 3 - Frequency of inclusion of oncology medicines indicated for breast cancer in the NEMs studied

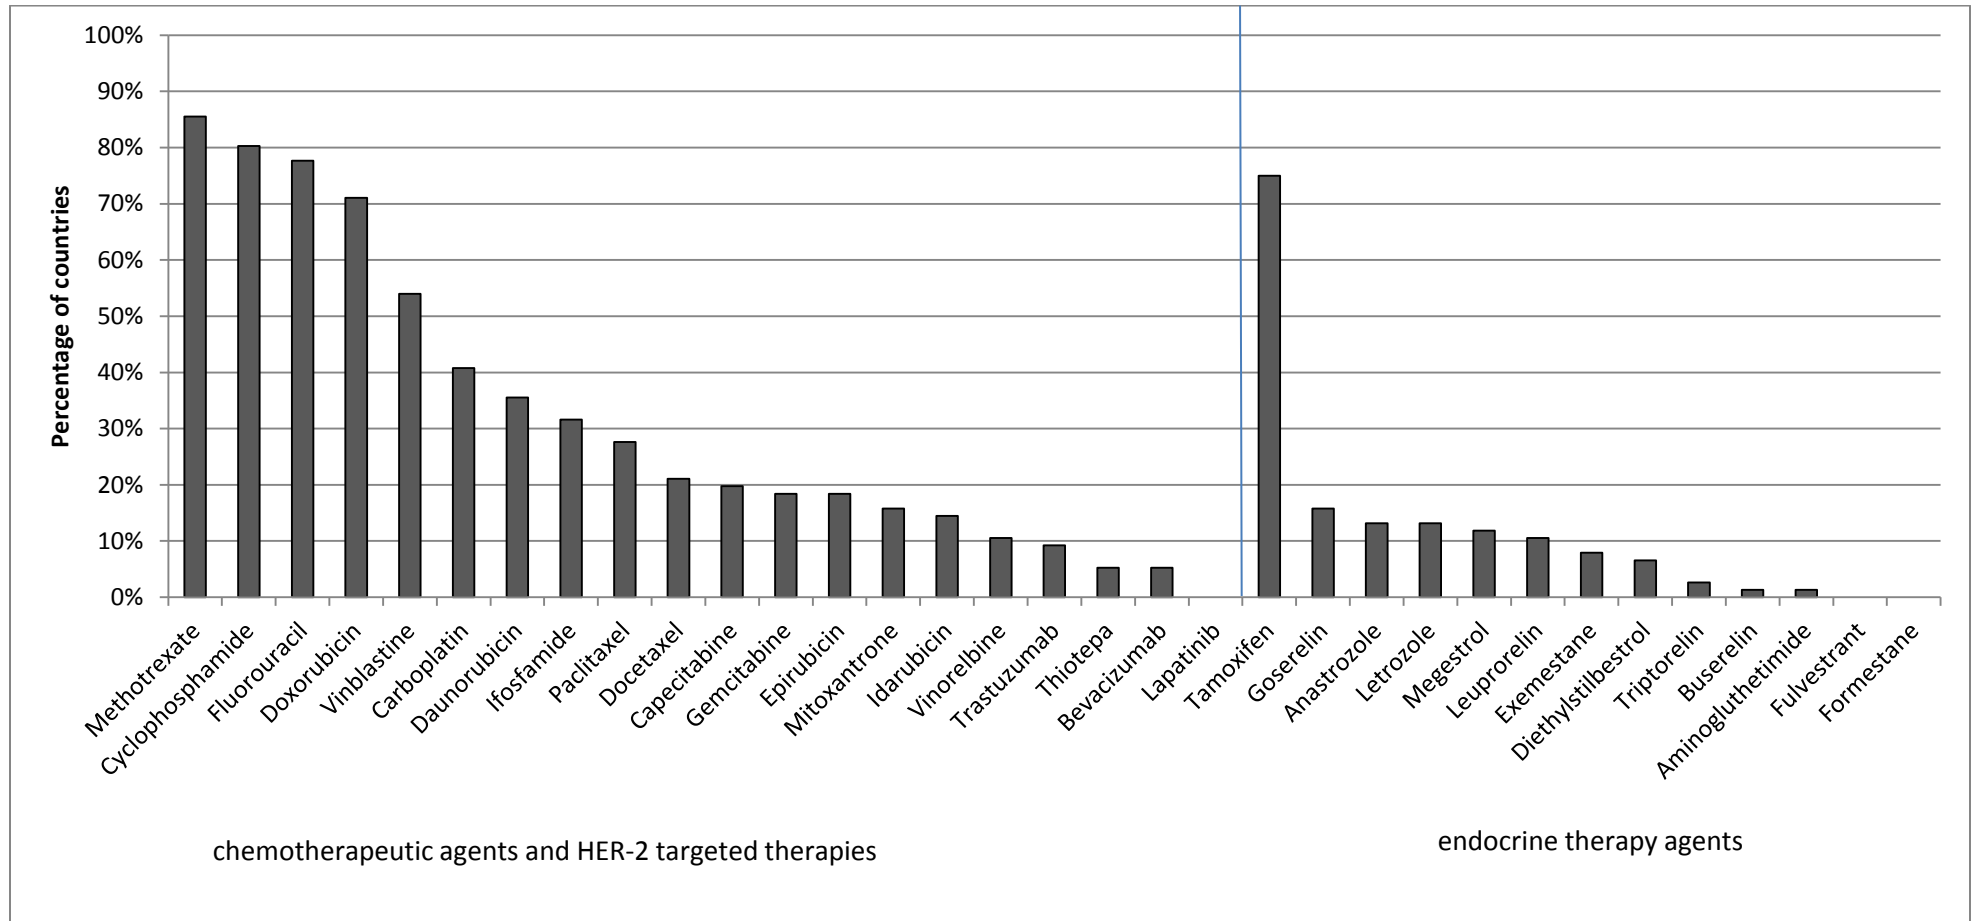

Supplement: 12885_2015_1583_MOESM1_ESM.pdf [file 12885_2015_1583_MOESM1_ESM.pdf]
